# Supplementary material
Source: Springer Nature journal article supplement (https://www.springermedizin.de/resource/supplementary/12936_2014_3326_MOESM17_ESM.pdf/9545666)

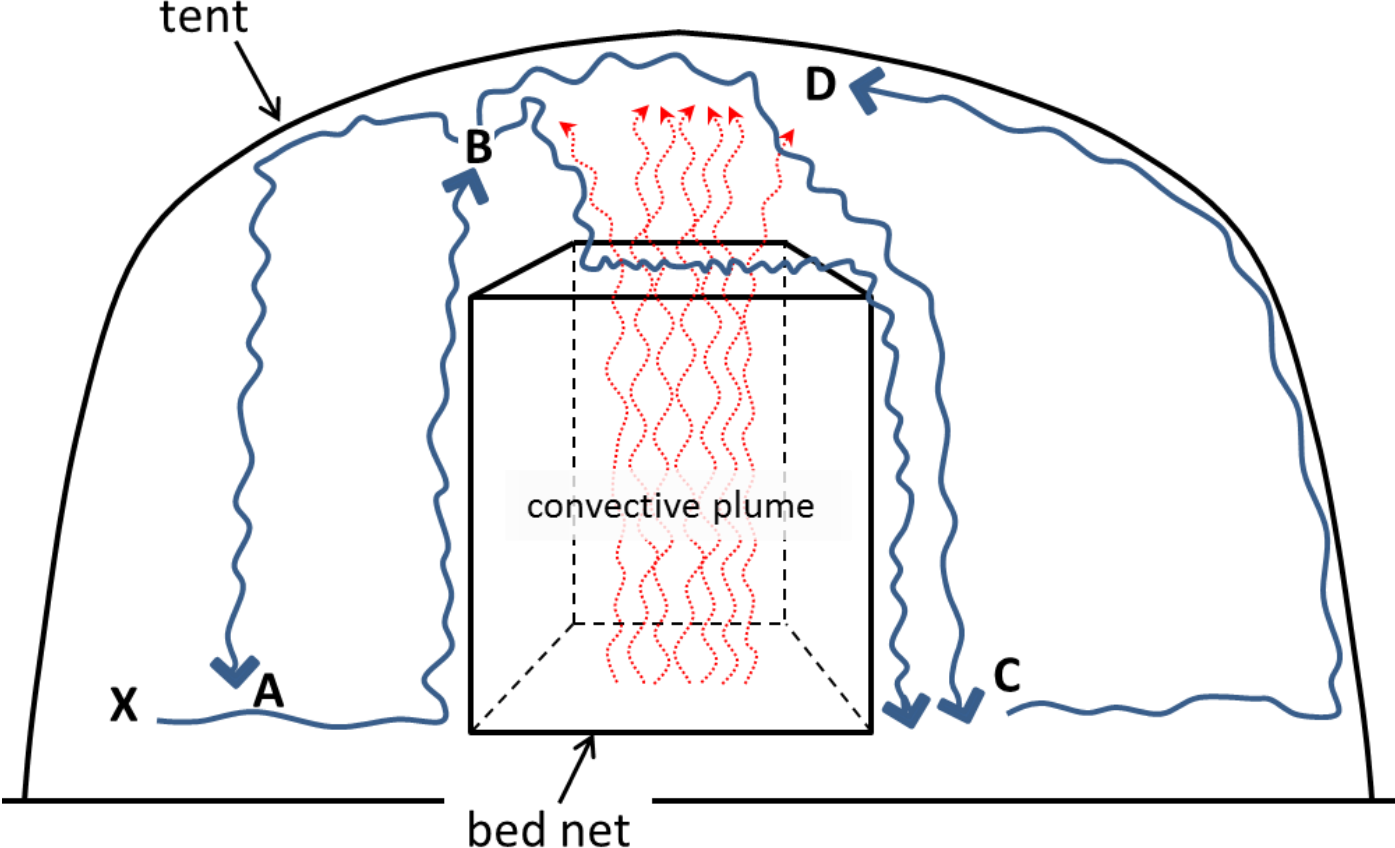

Supplement: MOESM17 [file 9545666]
